# Supplementary material for: On the role of transcription in positioning nucleosomes
Source: PLOS journal article supplement (doi:10.1371/journal.pcbi.1008556), 2021-01-08

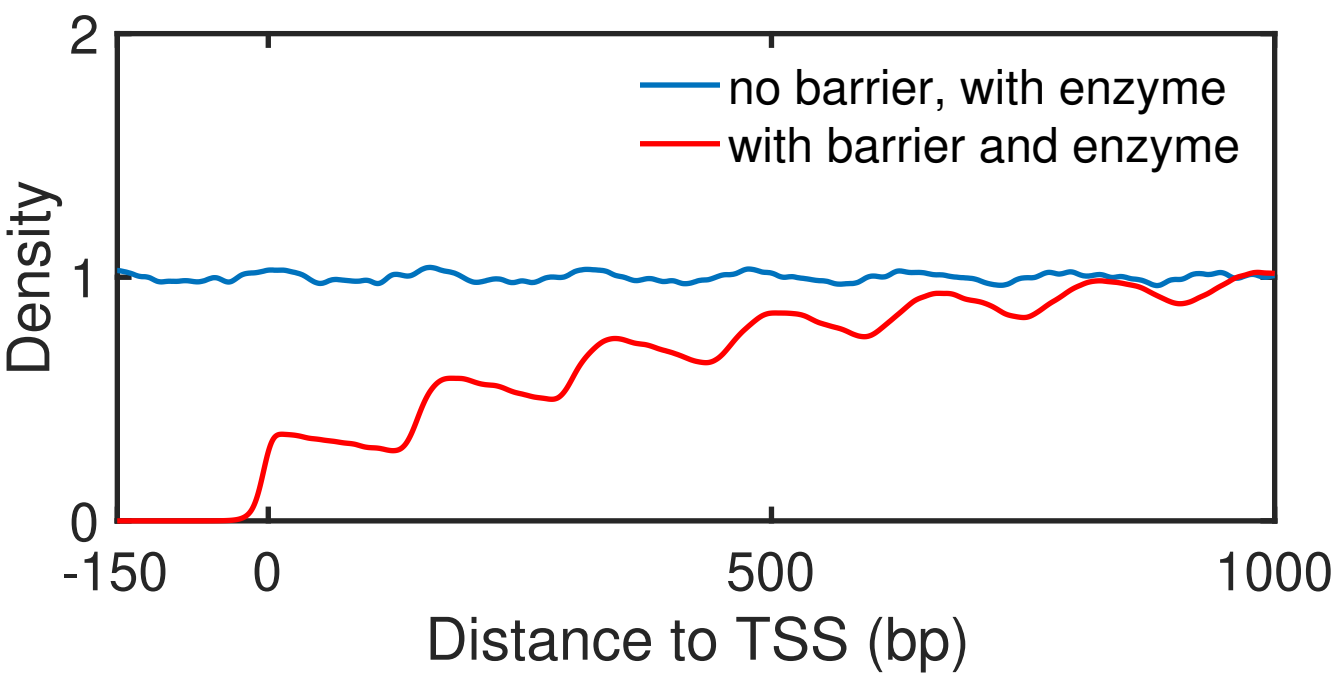

Supplement: S8 (10.1371/journal.pcbi.1008556.s008) [file journal.pcbi.1008556.s008]
